# Supplementary material
Source: PubMed Central journal article supplement (PMC6978898)

### Purebred

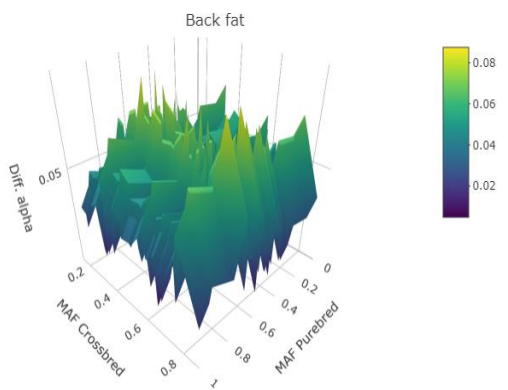

### Crossbred

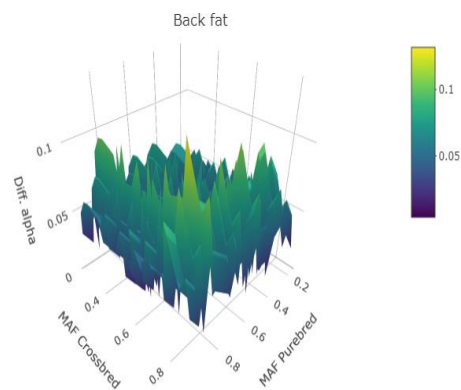

### Loin depth

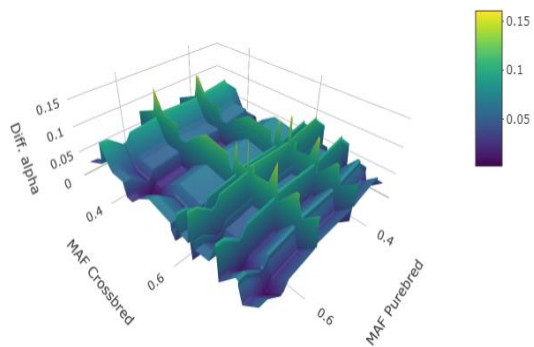

### Loin depth

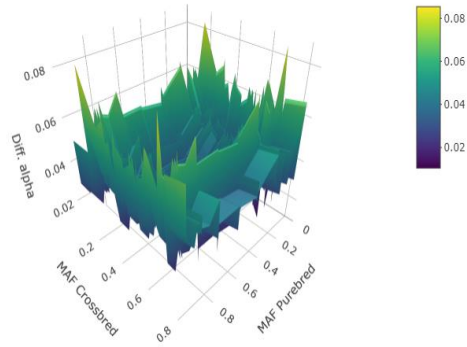

### Carcass daily gain

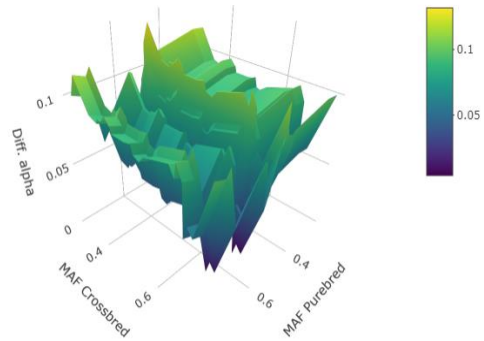

### Carcass daily gain

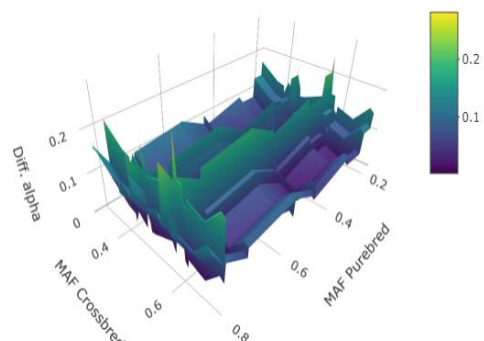

Supplement: skz360_suppl_supplementary_figure_s1.pdf [file skz360_suppl_supplementary_figure_s1.pdf]
